# Supplementary material
Source: publisher figshare collection journal article supplement (https://acs.figshare.com/ndownloader/files/5751639)
Supplement: Supplementary file 1 [file 5751639]

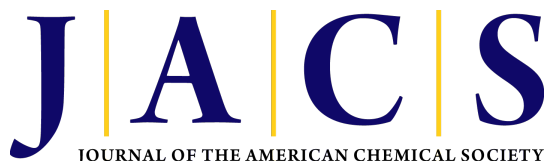

JOURNAL OF THE AMERICAN CHEMICAL SOCIETY

J. Am. Chem. Soc., 1997, 119(23), 5348-5354, DOI:[10.1021/ja9619925](https://doi.org/10.1021/ja9619925)

#### Terms & Conditions

Electronic Supporting Information files are available without a subscription to ACS Web Editions. The American Chemical Society holds a copyright ownership interest in any copyrightable Supporting Information. Files available from the ACS website may be downloaded for personal use only. Users are not otherwise permitted to reproduce, republish, redistribute, or sell any Supporting Information from the ACS website, either in whole or in part, in either machine-readable form or any other form without permission from the American Chemical Society. For permission to reproduce, republish and redistribute this material, requesters must process their own requests via the RightsLink permission system. Information about how to use the RightsLink permission system can be found at <http://pubs.acs.org/page/copyright/permissions.html>

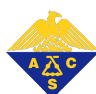

ACS Publications

MOST TRUSTED. MOST CITED. MOST READ.

Copyright © 1997 American Chemical Society

## Supplementary Material.

### Intramolecular Long-Distance Electron Transfer and Triplet Energy Transfer. Photophysical and Photochemical Studies on a Norbornadiene-Steroid-Benzidine System

Chen-Ho Tung,\* Li-Ping Zhang and Yi Li

*Institute of Photographic Chemistry, Chinese Academy of Sciences, Beijing 100101, China*

Hong Cao and Yoshifumi Tanimoto

*Department of Chemistry, Faculty of Science, Hiroshima University,*

*Kagamiyama, Higashi-Hiroshima, Japan 739*

**3 $\beta$ -hydroxy-androst-5-en-17 $\beta$ -yl-2,2',6,6',N,N',N'-heptamethylbenzidine (HO-S-17 $\beta$ -B) and 3 $\beta$ -hydroxy-androst-5-en-17 $\alpha$ -yl-2,2',6,6',N,N',N'-heptamethylbenzidine (HO-S-17 $\alpha$ -B).** These compounds were synthesized as described in the literature for reductive amination of ketones with sodium triacetoxymethylborohydride as reducing agent.<sup>1</sup> The mixture of the distereomers HO-S-17 $\beta$ -B and HO-S-17 $\alpha$ -B were obtained. These isomeric amines were separated by chromatography on silica with methylene chloride/ ethyl acetate/ petroleum ether (3/2/12) as eluant. HO-S-17 $\beta$ -B : m.p. 138-140 °C; Anal: Calcd for C<sub>38</sub>H<sub>54</sub>N<sub>2</sub>O: C: 82.31, H: 9.75, N: 5.05, Found: C: 82.24, H:9.67, N:4.98; IR (KBr, cm<sup>-1</sup>): 3570 (-O-H), 2810 (-CH<sub>3</sub>), 1630 (phenyl), 1600 (-C=C), 1350 (C-N), <sup>1</sup>H NMR(CDCl<sub>3</sub>, 300 MHz): 7.20 (s, 4H, ArH), 5.40 (dd, 1H, steroid olefinic H), 3.49 (m, 1H, 3 $\alpha$ -H), 3.40 (m, 1H, 17 $\alpha$ -H), 2.90 (s, 6H, N'CH<sub>3</sub>), 2.80 (s, 3H, NCH<sub>3</sub>), 2.25 (s, 12H, ArCH<sub>3</sub>), 2.40-1.10 (m, 19H), 1.05 (s, 3H, 19-CH<sub>3</sub>) 0.90 (s, 3H, 18-CH<sub>3</sub>) MS: m/e 555 (M<sup>+</sup>+1). HO-S-17 $\alpha$ -B : <sup>1</sup>H NMR (CDCl<sub>3</sub>, 300 MHz): 7.20 (s, 4H, ArH), 5.40 (dd, 1H, steroid olefinic H), 3.49 (m, 1H, 3 $\alpha$ -H), 3.10 (m, 1H, 17 $\beta$ -H) 2.90 (s, 6H, N'CH<sub>3</sub>), 2.80(s, 3H, N'CH<sub>3</sub>), 2.25 (s, 12H, ArCH<sub>3</sub>), 2.40-1.10 (m, 19H), 1.05 (s, 3H, 19 CH<sub>3</sub>), 0.90 (s, 3H, 18 CH<sub>3</sub>).

**3 $\beta$ -(2-(Methoxycarbonyl)bicyclo-[2.2.1]hepta-2,5-diene-3-yl)-carboxy)-androst-5-en-17 $\beta$ -yl-2,2',6,6',N,N',N'-heptamethylbenzidine (N-S-B).** This compound was prepared by esterification of 2-(methoxycarbonyl)bicyclo[2,2,1]hepta-2,5-diene-3-carboxylyl chloride with HO-S-17 $\beta$ -B by use of a procedure as described in the previous paper.<sup>2</sup> A 50 ml round bottom flask equipped with a magnetic stir bar and a condenser with a nitrogen inlet tube. The apparatus was flame dried under dry nitrogen and charged with anhydrous 2-(methoxycarbonyl)bicyclo[2,2,1]hepta-2,5-diene-3-carboxylic acid (0.35g, 1.8 mmol) and thionyl chloride (5 ml). The mixture was refluxed for 3 h and the excess of thionyl chloride was removed under reduced pressure. The resulting 2-(methoxycarbonyl) bicyclo[2,2,1]hepta-2,5-diene-3-carboxylyl chloride was dissolved in anhydrous tetrahydrofuran (5 ml), and to the solution was added first HO-S-17 $\beta$ -B (1g 1.81 mmol) and then anhydrous triethylamine (0.2 ml). The mixture was refluxed overnight, at which time TLC analysis showed the complete disappearance of the alcohol. Water was then added, and the mixture was extracted with chloroform. The chloroform extract was washed successively with sodium bicarbonate solution (5%) and water. The organic layer was dried over MgSO<sub>4</sub>. Evaporation of the solvent afforded a yellow oily product. The product was purified by column chromatography on silica eluted with methylene chloride/ ethyl acetate (2/7 in volume) to give N-S-B as white crystals (32%). m.p. 167-169 °C; Anal. Calcd for C<sub>48</sub>H<sub>62</sub>N<sub>2</sub>O<sub>4</sub>: C: 78.90, H: 8.49, N: 3.84, Found: C: 78.75, H: 8.21, N:3.65. IR(KBr, cm<sup>-1</sup>) : 2930 (C-H), 2810 (-CH<sub>3</sub>), 1720 (-COO), 1700 (-C=O), 1630 (phenyl), 1600 (-C=C), 1350 (C-N), 1240 (-C-O), <sup>1</sup>H NMR (CDCl<sub>3</sub>, 300 MHz), 7.20 (s, 4H, ArH), 6.95 (dd, 1H, NBD olefinic H), 6.90 (dd, 1H, NBD olefinic H), 5.40 (dd, 1H, steroid olefinic H), 4.25 (dd, 1H, NBD bridgehead H), 4.15 (m, 1H, NBD bridgehead H), 3.95 (s, 3H, O-CH<sub>3</sub>), 3.55 (m, 1H, 3 $\alpha$ -H), 3.40 (m, 1H, 17 $\alpha$ -H), 2.90 (s, 6H, N-CH<sub>3</sub>), 2.80 (s, 3H, NCH<sub>3</sub>), 2.25 (s, 12H, Ar-CH<sub>3</sub>), 2.05-2.55 (m, 2H, NBD bridge H), 2.40-1.10 (m, 19H), 1.05 (s, 3H, 19CH<sub>3</sub>), 0.90 (s, 3H, 18CH<sub>3</sub>).

**3 $\beta$ -(2-(Methoxycarbonyl)quadriclane-3-yl)-carboxy)androst-5-en-17 $\beta$ -yl-**

**2,2',6,6',N,N,'N'-heptamethylbenzidine (Q-S-B).** A N<sub>2</sub>-saturated solution of N-S-B ( $2 \times 10^{-4}$  M) in 200 ml cyclohexane was irradiated at  $\lambda > 300$  nm at room temperature. The yield of the product was determined by <sup>1</sup>H NMR spectroscopic analysis of the crude reaction mixture and by HPLC analysis. The product was separated from the photolysed mixture by TLC on silica with methylene chloride/ ethyl acetate/ petroleum ether (2/1/8 in volume) as eluant. MS m/e: 731(M<sup>+</sup>+1); IR (KBr, cm<sup>-1</sup>): 2930 (C-H), 2810 (-CH<sub>3</sub>), 1720 (-COO), 1700 (-C=O), 1640 (phenyl), 1600 (-C=C), 1350 (C-N), 1240 (-C-O), <sup>1</sup>H NMR (CDCl<sub>3</sub>): 7.20 (s, 4H, ArH), 5.40 (dd, 4H, steroid clefinic H), 3.75 (s, 3H, OCH<sub>3</sub>), 3.55 (m, 1H, 3 $\alpha$ -H), 3.40 (m, 1H, 17 $\alpha$ -H), 2.90 (s, 6H, N-CH<sub>3</sub>), 2.80 (s, 3H, NCH<sub>3</sub>), 2.75-2.85 (m, 2H, QC bridge lead H), 2.55 (m, 2H, QC cyclobutane H), 2.35 (m, 2H, QC bridge H), 2.40-1.10 (m, 19H), 2.25 (s, 12H, Ar-CH<sub>3</sub>), 1.05 (s, 3H, 19-CH<sub>3</sub>), 0.90 (s, 3H, 18-CH<sub>3</sub>).

## References

1. (a) Hutchins, R. O.; Su, W.; Sivakumar, R.; Cistone, F.; Steroho, Y. P. *J. Org. Chem.* **1983**, *86*, 3412. (b) Adel-Magdid, D. F.; Maryanoff, C. A.; Carson, K. G. *Tetrahedron Lett.* **1990**, *31*, 5595.
2. Tung, C.-H.; Zhang, L.-P.; Li, Y.; Cao, H.; Tanimoto, Y. *J. Phys. Chem.* **1996**, *100*, 4480.
